# Supplementary material for: Comparison of Physical Fitness Profiles Obtained before and during COVID-19 Pandemic in Two Independent Large Samples of Children and Adolescents: DAFIS Project
Source: Int J Environ Res Public Health. 2022 Mar 26;19(7):3963. doi: 10.3390/ijerph19073963 (PMC8998010; doi:10.3390/ijerph19073963)
Supplement: Supplementary file 1 [file ijerph-19-03963-s001.zip › ijerph-1619942-supplementary.pdf]

**Table S1.** Pearson's chi-squared ( $\chi^2$ ). Association between the sample assessed (Prepandemic and Pandemic) and distribution regarding sex.

|                    |                                 | SEX    |        |         |
|--------------------|---------------------------------|--------|--------|---------|
|                    |                                 | Boys   | Girls  | Total   |
| <b>Prepandemic</b> | Count                           | 7543   | 7744   | 15287   |
|                    | Expected Count                  | 7600.4 | 7686.6 | 15287.0 |
|                    | % within Pre-pandemic; Pandemic | 49.3%  | 50.7%  | 100%    |
|                    | Standardized Residual           | -0.7   | 0.7    |         |
| <b>Pandemic</b>    | Count                           | 1102   | 999    | 2101    |
|                    | Expected Count                  | 1044.6 | 1056.4 | 2101.0  |
|                    | % within Pre-pandemic; Pandemic | 52.5%  | 47.5%  | 100%    |
|                    | Standardized Residual           | 1.8    | -1.8   |         |

$\chi^2_1 = 7.140$ ;  $p = 0.008$

**Table S2.** Pearson's chi-squared ( $\chi^2$ ). Association between the sample assessed (Prepandemic and Pandemic) and distribution regarding age groups.

|                    |                                 | Age group |            |             |             |             |             |         |
|--------------------|---------------------------------|-----------|------------|-------------|-------------|-------------|-------------|---------|
|                    |                                 | 6-8 years | 8-10 years | 10-12 years | 12-14 years | 14-16 years | 16-18 years | Total   |
| <b>Prepandemic</b> | Count                           | 2163      | 2736       | 3060        | 3508        | 2374        | 1446        | 15287   |
|                    | Expected Count                  | 2224.3    | 2683.2     | 3088.5      | 3472.7      | 2394.9      | 1423.4      | 15287.0 |
|                    | % within Pre-pandemic; Pandemic | 14.1%     | 17.9%      | 20.0%       | 22.9%       | 15.5%       | 9.5%        | 100%    |
|                    | Standardized Residual           | -1.3      | 1.0        | -0.5        | 0.6         | -0.4        | 0.6         |         |
| <b>Pandemic</b>    | Count                           | 367       | 316        | 453         | 442         | 350         | 173         | 2101    |
|                    | Expected Count                  | 305.7     | 368.8      | 424.5       | 477.3       | 329.1       | 195.6       | 2101.0  |
|                    | % within Pre-pandemic; Pandemic | 17.5%     | 15.0%      | 21.6%       | 21.0%       | 16.7%       | 8.2%        | 100%    |
|                    | Standardized Residual           | 3.5       | -2.7       | 1.4         | -1.6        | 1.1         | -1.6        |         |

$\chi^2_5 = 32.197$ ;  $p < 0.001$

**Table S3.** Pearson's chi-squared ( $\chi^2$ ). Association between the sample assessed (Prepandemic and Pandemic) and distribution regarding Body Mass Index category for boys.

| Boys        |                                     | Body Mass Index Category |               |            |         | Total  |
|-------------|-------------------------------------|--------------------------|---------------|------------|---------|--------|
|             |                                     | Underweight              | Normal Weight | Overweight | Obesity |        |
| Prepandemic | Count                               | 29                       | 4654          | 1736       | 773     | 7192   |
|             | Expected Count                      | 30.4                     | 4610.9        | 1757.8     | 792.8   | 7192.0 |
|             | % within Pre-pandemic;<br>Pandemic  | 0.4%                     | 64.7%         | 24.1%      | 10.7%   | 100%   |
|             | Standardized Residual               | -0.3                     | 0.6           | -0.5       | -0.7    |        |
| Pandemic    | Count                               | 6                        | 650           | 286        | 139     | 1081   |
|             | Expected Count                      | 4.6                      | 693.1         | 264.2      | 119.2   | 1081.0 |
|             | % wiithin Pre-pandemic;<br>Pandemic | 0.6%                     | 60.1%         | 26.5%      | 12.9%   | 100%   |
|             | Standardized Residual               | 0.7                      | -1.6          | 1.3        | 1.8     |        |

$\chi^2_3 = 9.453$ ;  $p = 0.024$

**Table S4.** Pearson's chi-squared ( $\chi^2$ ). Association between the sample assessed (Prepandemic and Pandemic) and distribution regarding Body Mass Index category for girls.

| Girls       |                                     | Body Mass Index Category |               |            |         | Total  |
|-------------|-------------------------------------|--------------------------|---------------|------------|---------|--------|
|             |                                     | Underweight              | Normal Weight | Overweight | Obesity |        |
| Prepandemic | Count                               | 52                       | 4709          | 1923       | 711     | 7395   |
|             | Expected Count                      | 54.8                     | 4686.6        | 1921.6     | 732.1   | 7395.0 |
|             | % within Pre-pandemic;<br>Pandemic  | 0.7%                     | 63.7%         | 26.0%      | 9.6%    | 100%   |
|             | Standardized Residual               | -0.4                     | 0.3           | 0          | -0.8    |        |
| Pandemic    | Count                               | 10                       | 598           | 253        | 118     | 979    |
|             | Expected Count                      | 7.2                      | 620.4         | 254.4      | 96.9    | 979.0  |
|             | % wiithin Pre-pandemic;<br>Pandemic | 1.0%                     | 61.1%         | 25.8%      | 12.1%   | 100%   |
|             | Standardized Residual               | 1.0                      | -0.9          | -0.1       | 2.1     |        |

$\chi^2_3 = 7.303$ ;  $p = 0.063$

**Table S5.** Pearson's chi-squared ( $\chi^2$ ). Association between the sample assessed (Prepandemic and Pandemic) and distribution regarding Waist to Height Ratio cut points for boys.

|             |                                 | Waist to Height Ratio |        |        |
|-------------|---------------------------------|-----------------------|--------|--------|
| Boys        |                                 | <0.5                  | >0.5   | Total  |
| Prepandemic | Count                           | 4854                  | 1975   | 6829   |
|             | Expected Count                  | 4801.3                | 2027.7 | 6829.0 |
|             | % within Pre-pandemic; Pandemic | 71.1%                 | 28.9%  | 100%   |
|             | Standardized Residual           | 0.8                   | -1.2   |        |
| Pandemic    | Count                           | 701                   | 371    | 1072   |
|             | Expected Count                  | 75.7                  | 318.3  | 1072.0 |
|             | % within Pre-pandemic; Pandemic | 65.4%                 | 34.6%  | 100%   |
|             | Standardized Residual           | -1.9                  | 3.0    |        |

$\chi^2_1 = 14.357$ ;  $p < 0.001$

**Table S6.** Pearson's chi-squared ( $\chi^2$ ). Association between the sample assessed (Prepandemic and Pandemic) and distribution regarding Waist to Height Ratio cut points for girls.

|             |                                 | Waist to Height Ratio |        |        |
|-------------|---------------------------------|-----------------------|--------|--------|
| Girls       |                                 | <0.5                  | >0.5   | Total  |
| Prepandemic | Count                           | 5183                  | 1806   | 6989   |
|             | Expected Count                  | 5171.5                | 1817.5 | 6989.0 |
|             | % within Pre-pandemic; Pandemic | 74.2%                 | 25.8%  | 100%   |
|             | Standardized Residual           | 0.2                   | -0.3   |        |
| Pandemic    | Count                           | 707                   | 264    | 971    |
|             | Expected Count                  | 718.5                 | 252.5  | 971.0  |
|             | % within Pre-pandemic; Pandemic | 72.8%                 | 27.2%  | 100%   |
|             | Standardized Residual           | -0.4                  | 0.7    |        |

$\chi^2_1 = 0.805$ ;  $p = 0.370$

**Table S7.** Pearson's chi-squared ( $\chi^2$ ). Association between the sample assessed (Prepandemic and Pandemic) and distribution regarding Handgrip cut points for boys.

|                    |                                 | Handgrip   |            |        |
|--------------------|---------------------------------|------------|------------|--------|
| Boys               |                                 | <Cut Point | ≥Cut Point | Total  |
| <b>Prepandemic</b> | Count                           | 3257       | 2561       | 5818   |
|                    | Expected Count                  | 3341.5     | 2476.5     | 5818.0 |
|                    | % within Pre-pandemic; Pandemic | 56.0%      | 44.0%      | 100%   |
|                    | Standardized Residual           | -1.5       | 1.7        |        |
| <b>Pandemic</b>    | Count                           | 571        | 276        | 847    |
|                    | Expected Count                  | 486.5      | 360.5      | 847.0  |
|                    | % within Pre-pandemic; Pandemic | 67.4%      | 32.6%      | 100%   |
|                    | Standardized Residual           | 3.8        | -4.5       |        |

$\chi^2_1 = 39.532$ ;  $p < 0.001$

**Table S8.** Pearson's chi-squared ( $\chi^2$ ). Association between the sample assessed (Prepandemic and Pandemic) and distribution regarding Handgrip cut points for girls.

|                    |                                 | Handgrip   |            |        |
|--------------------|---------------------------------|------------|------------|--------|
| Girls              |                                 | <Cut Point | ≥Cut Point | Total  |
| <b>Prepandemic</b> | Count                           | 3707       | 2303       | 6010   |
|                    | Expected Count                  | 3631.9     | 2378.1     | 6010.0 |
|                    | % within Pre-pandemic; Pandemic | 61.7%      | 38.3%      | 100%   |
|                    | Standardized Residual           | 1.2        | -1.5       |        |
| <b>Pandemic</b>    | Count                           | 386        | 377        | 763    |
|                    | Expected Count                  | 461.1      | 301.9      | 763.0  |
|                    | % within Pre-pandemic; Pandemic | 50.6%      | 49.4%      | 100%   |
|                    | Standardized Residual           | -3.5       | 4.3        |        |

$\chi^2_1 = 34.828$ ;  $p < 0.001$

**Table S9.** Pearson's chi-squared ( $\chi^2$ ). Association between the sample assessed (Prepandemic and Pandemic) and distribution regarding Standing Long Jump cut points for boys.

|                                   |                                 | Standing Long Jump |            | Total  |
|-----------------------------------|---------------------------------|--------------------|------------|--------|
|                                   |                                 | <Cut Point         | ≥Cut Point |        |
| <b>Boys</b><br><b>Prepandemic</b> | Count                           | 4825               | 1230       | 6055   |
|                                   | Expected Count                  | 4814.0             | 1241.0     | 6055.0 |
|                                   | % within Pre-pandemic; Pandemic | 79.7%              | 20.3%      | 100%   |
|                                   | Standardized Residual           | 0.2                | -0.3       |        |
| <b>Pandemic</b>                   | Count                           | 726                | 201        | 927    |
|                                   | Expected Count                  | 737.0              | 190.0      | 927.0  |
|                                   | % within Pre-pandemic; Pandemic | 78.3%              | 21.7%      | 100%   |
|                                   | Standardized Residual           | -0.4               | 0.8        |        |

$\chi^2_1 = 0.925$ ;  $p = 0.336$

**Table S10.** Pearson's chi-squared ( $\chi^2$ ). Association between the sample assessed (Prepandemic and Pandemic) and distribution regarding Standing Long Jump cut points for girls.

|                                    |                                 | Standing Long Jump |            | Total  |
|------------------------------------|---------------------------------|--------------------|------------|--------|
|                                    |                                 | <Cut Point         | ≥Cut Point |        |
| <b>Girls</b><br><b>Prepandemic</b> | Count                           | 5490               | 695        | 6185   |
|                                    | Expected Count                  | 5456.4             | 728.6      | 6185.0 |
|                                    | % within Pre-pandemic; Pandemic | 88.8%              | 11.2%      | 100%   |
|                                    | Standardized Residual           | 0.5                | -1.2       |        |
| <b>Pandemic</b>                    | Count                           | 688                | 130        | 818    |
|                                    | Expected Count                  | 721.6              | 96.4       | 818.0  |
|                                    | % within Pre-pandemic; Pandemic | 84.1%              | 15.9%      | 100%   |
|                                    | Standardized Residual           | -1.3               | 3.4        |        |

$\chi^2_1 = 15.067$ ;  $p < 0.001$

**Table S11.** Pearson's chi-squared ( $\chi^2$ ). Association between the sample assessed (Prepandemic and Pandemic) and distribution regarding 20m Shuttle Run Test cut points for boys.

|             |                                 | 20m Shuttle Run Test                        |                                             | Total  |
|-------------|---------------------------------|---------------------------------------------|---------------------------------------------|--------|
| Boys        |                                 | <41.8ml.kg <sup>-1</sup> .min <sup>-1</sup> | ≥41.8ml.kg <sup>-1</sup> .min <sup>-1</sup> |        |
| Prepandemic | Count                           | 4050                                        | 787                                         | 4837   |
|             | Expected Count                  | 4041.5                                      | 795.5                                       | 4837.0 |
|             | % within Pre-pandemic; Pandemic | 83.7%                                       | 16.3%                                       | 100%   |
|             | Standardized Residual           | 0.1                                         | -0.3                                        |        |
| Pandemic    | Count                           | 543                                         | 117                                         | 660    |
|             | Expected Count                  | 551.5                                       | 108.5                                       | 660.0  |
|             | % within Pre-pandemic; Pandemic | 82.3%                                       | 17.7%                                       | 100%   |
|             | Standardized Residual           | -0.4                                        | 0.8                                         |        |

$\chi^2_1 = 0.897$ ;  $p = 0.344$

**Table S12.** Pearson's chi-squared ( $\chi^2$ ). Association between the sample assessed (Prepandemic and Pandemic) and distribution regarding 20m Shuttle Run Test cut points for girls.

|             |                                 | 20m Shuttle Run Test                        |                                             | Total  |
|-------------|---------------------------------|---------------------------------------------|---------------------------------------------|--------|
| Girls       |                                 | <34.6ml.kg <sup>-1</sup> .min <sup>-1</sup> | ≥34.6ml.kg <sup>-1</sup> .min <sup>-1</sup> |        |
| Prepandemic | Count                           | 4568                                        | 318                                         | 4886   |
|             | Expected Count                  | 4564.5                                      | 321.5                                       | 4886.0 |
|             | % within Pre-pandemic; Pandemic | 93.5%                                       | 6.5%                                        | 100%   |
|             | Standardized Residual           | 0.1                                         | -0.2                                        |        |
| Pandemic    | Count                           | 571                                         | 44                                          | 615    |
|             | Expected Count                  | 574.5                                       | 40.5                                        | 615.0  |
|             | % within Pre-pandemic; Pandemic | 92.8%                                       | 7.2%                                        | 100%   |
|             | Standardized Residual           | -0.1                                        | 0.6                                         |        |

$\chi^2_1 = 0.371$ ;  $p = 0.543$
